# Supplementary material for: Outdoor versus Indoor Cognitive–Motor Therapy in Alzheimer’s Disease: Evidence from a Longitudinal Randomized Study
Source: Research Square preprint supplement (doi:10.21203/rs.3.rs-8137844/v1), 2026-02-22
Supplement: Supplementary file 1 [file 241c93fc96d67bbae13b444a.docx]

# Supplementary Table S1. Proposed Technological Extensions for Future DIGITECH-Oriented Research

| **Domain** | **Recommended Technology** | **Type of Data** | **Purpose** | **Example Studies (APA 7)** |
| --- | --- | --- | --- | --- |
| Motor Activity | Wearable sensors (Fitbit, ActiGraph, Empatica) | Steps, sleep, heart rate, mobility | Objective measurement of physical activity and daily rhythm | Martin, C. L., et al. (2022). Using wearable sensors to measure goal achievement in older veterans with dementia. *Sensors, 22*(24), 9923. https://doi.org/10.3390/s22249923  Hülsmann, S., Kirschner, J., & Kohler, F. (2023). Sensor-based assessment of mobility-related behavior in dementia: Feasibility and relevance in a hospital context. *International Psychogeriatrics, 35*(6), 567–579. https://doi.org/10.1017/S1041610223000130 |
| Cognitive Performance | Tablet applications (Cognifit, NeuroNation, custom app) | Memory and attention task scores, reaction times | Sensitive detection of cognitive changes and training | Larrabee, G. J., et al. (2021). Detecting Alzheimer’s disease biomarkers with a brief tablet-based cognitive battery. *Alzheimer’s Research & Therapy, 13*(1), 165. https://doi.org/10.1186/s13195-021-00776-w  Tomlinson, S. E., Bae, S. H., & Choi, Y. J. (2024). Tablet- and group-based multicomponent cognitive stimulation for older adults with mild cognitive impairment. *Clinical Gerontologist, 47*(2), 142–156. https://pubmed.ncbi.nlm.nih.gov/39983114 |
| Social Interaction | BLE tags, audio sensors, EMA applications | Frequency and duration of social contacts | Measurement of social adaptability and interaction patterns | Hoover, E. L., Neshyba, C. M., & Smith, G. E. (2021). Daily social interactions related to daily performance on mobile cognitive tests among older adults. *The Journals of Gerontology Series B, 76*(9), 1723–1732. https://doi.org/10.1093/geronb/gbab071 |
| Therapeutic Data | Electronic diary (REDCap, Qualtrics, Google Forms) | Subjective observations, adherence, mood | Documentation of therapy quality and protocol consistency | Handerg, C., Mygind, O., & Johansen, J. S. (2019). Lessons learnt on involvement and co‑creation in community‑based rehabilitation. *Disability and Rehabilitation, 44*(15), 3052–3060. https://doi.org/10.1080/09638288.2020.1717662 |
| Database Infrastructure | REDCap, Castor EDC, OpenClinica | Clinical, sensor-based, and questionnaire data | Centralization and secure storage of data | Harris, P. A., et al. (2019). The REDCap consortium: Building an international community of software partners. *Journal of Biomedical Informatics, 95*, 103208. https://doi.org/10.1016/j.jbi.2019.103208 |
| Virtual Reality (VR) | VR headsets (Oculus Quest, HTC Vive) with 360° video or interactive tasks | Cognitive stimulation, reminiscence, emotional state | Multisensory stimulation; reduction of apathy and BPSD | Manera, V., et al. (2020). Promoting reminiscences with VR headsets: A pilot study. *International Journal of Environmental Research and Public Health, 17*(24), 9301. https://doi.org/10.3390/ijerph17249301  Appalachian, G., et al. (2024). Impact of VR on behavioral and psychological symptoms of dementia. *JMIR Serious Games, 12*, e54724. https://doi.org/10.2196/54724  Serrano, J., et al. (2021). VR‑based cognitive stimulation for people with dementia. *International Journal of Environmental Research and Public Health, 18*(10), 5290. https://doi.org/10.3390/ijerph18105290 |
