# Supplementary material for: Outdoor versus Indoor Cognitive–Motor Therapy in Alzheimer’s Disease: Evidence from a Longitudinal Randomized Study
Source: Research Square preprint supplement (doi:10.21203/rs.3.rs-8137844/v1), 2026-02-22
Supplement: Supplementary file 3 [file d029579deb5262cb3a230c8c.docx]

**RESEARCH PROTOCOL**

**PART 1**

**1. Project Summary**

This research project focuses on comparing the effectiveness of outdoor versus indoor cognitive–motor therapy in women diagnosed with late-onset Alzheimer’s disease. The study was conducted as a randomized controlled trial (RCT) with double blinding of outcome assessors and data analysts. The primary objective was to evaluate the impact of the therapeutic environment (outdoor vs. indoor) on cognitive performance and functional independence. The study sample consisted of 50 women aged 66–70 years residing long-term in two specialized social care facilities. The intervention was implemented over a period of seven months, with a frequency of five therapy sessions per week (45 minutes each). Both groups received identical therapeutic content (a combination of cognitive rehabilitation, psychomotor therapy, and occupational therapy), differing only in the setting in which the intervention was delivered.

Cognitive function was assessed using the Mini-Mental State Examination (MMSE), and functional independence was evaluated using the Functional Independence Measure (FIM). Data were analyzed using non-parametric statistical methods. Results demonstrated cognitive improvement in both groups; however, significantly broader gains in functional independence, mobility, and social adaptability were observed exclusively in the outdoor therapy group. The study provides empirical evidence supporting the role of the natural environment as an active therapeutic component in non-pharmacological dementia care and offers direct implications for practice in health and social care institutions.

**2. General Information**

**Protocol title:** Outdoor versus Indoor Cognitive–Motor Therapy in Individuals with Alzheimer’s Disease: A Randomized Controlled Study

**Protocol identification number:** 2024/12/1_001 (The study was registered outside the WHO in accordance with the grant provider's instructions. The project and the resulting data underwent proper approval by the ethics committee in accordance with the grant provider's instructions in the Czech Republic. It was not possible to register the study with other organizations, as the grant conditions did not allow this. The project was approved by the Ministry of Regional Development of the Czech Republic and co-financed by the European Union)

**Date:** January 2024

**Sponsor / Funding:** ITI – DIGITECH project, reg. no. CZ.02.01.01/00/23_021/0010653 (OP JAK)

**Principal Investigator:** Assoc. Prof. Michal Vostrý, Ph.D.
J. E. Purkyně University in Ústí nad Labem

**Research team:** Multidisciplinary team including a special educator, occupational therapist, physiotherapist, and clinical psychologist

**Study sites:** Two long-term social care facilities with a special regime in the Czech Republic

**3. Rationale and Background**

Alzheimer’s disease represents a major medical and societal challenge, characterized by progressive cognitive decline, loss of independence, and reduced social adaptability. Non-pharmacological interventions—particularly cognitive rehabilitation and combined psychomotor approaches—are widely regarded as key strategies for maintaining quality of life in individuals with dementia. Current literature suggests that natural environments may enhance cognitive stimulation, emotional regulation, and motivation for activity. However, systematically controlled studies directly comparing indoor and outdoor therapeutic environments remain limited. This research addresses this gap and is situated at the intersection of modern rehabilitation, special education, and the concept of “green dementia care.”

**4. Study Goals and Objectives**

**Primary Objective**

To compare the effectiveness of outdoor versus indoor cognitive–motor therapy in women with Alzheimer’s disease.

**Secondary Objectives**

- To evaluate changes in cognitive performance (MMSE)
- To assess changes in functional independence (FIM: daily activities, mobility, social adaptability)
- To examine the safety and feasibility of outdoor therapy in institutional care setting

**5. Study Design**

The study was designed as a pilot longitudinal randomized controlled trial with parallel groups. Randomization was performed by an independent researcher using a computer-generated allocation list, with allocation concealment ensured through sealed opaque envelopes. Outcome assessors and data analysts were blinded to group assignment.

**6. Methodology**

**Participants**

Women diagnosed with late-onset Alzheimer’s disease (ICD-10: F00.01), with stable pharmacotherapy and preserved basic mobility, were included. Exclusion criteria comprised severe sensory impairment, acute medical instability, and inability to provide informed consent.

**Intervention**

Both groups participated in an identical therapeutic program (5 sessions per week, 45 minutes each, for 7 months). The sole difference between groups was the environment in which the therapy was delivered (outdoor garden areas vs. indoor facility spaces).

**Safety Considerations**

Adverse events were systematically monitored throughout the intervention period; no intervention-related adverse events were recorded.

**7. Data Collection and Statistical Analysis**

Standardized instruments—the MMSE (validated Czech version) and the FIM—were used. Due to non-normal data distribution, non-parametric statistical tests (Wilcoxon signed-rank test and Mann–Whitney U test) were applied. Effect sizes were calculated using the r coefficient.

**8. Ethical Considerations**

The study was approved by the Ethics Committee of Masaryk Hospital in Ústí nad Labem. All participants, or their legal representatives, provided informed consent prior to inclusion. The research was conducted in accordance with the Declaration of Helsinki and its subsequent amendments and the study was registered outside the WHO in accordance with the grant provider's instructions. The project and the resulting data underwent proper approval by the ethics committee in accordance with the grant provider's instructions in the Czech Republic. It was not possible to register the study with other organizations, as the grant conditions did not allow this. The project was approved by the Ministry of Regional Development of the Czech Republic and co-financed by the European Union,

**RESEARCH PROTOCOL**

**PART 2**

**1. Budget**

The project was funded through the OP JAK – DIGITECH program. The budget covered personnel costs, therapeutic materials, methodological supervision, and data analysis. No additional funding was required.

**2. Other Support for the Project**

No parallel or external funding from other grant schemes was received for this study.

**3. Collaboration and Links to Other Projects**

The study forms part of the broader DIGITECH research agenda focusing on the integration of innovative rehabilitation approaches and digital technologies in health and social care.

**4. Curriculum Vitae of Investigators**

Structured CVs of the principal investigator and co-investigators are available in the project documentation (maximum length: one page each). Research data or the CV of the principal investigator can be obtained upon request. Please use the contact details provided in the article.

**5. Financing and Insurance**

The intervention was conducted within the framework of standard institutional care. No additional insurance arrangements beyond existing institutional coverage were required.
